# Supplementary material for: Household Air Pollution from Biomass Fuel for Cooking and Adverse Fetal Growth Outcomes in Rural Sri Lanka
Source: MDPI journal article supplement (doi:10.3390/ijerph18041878), 2021-02-15
Supplement: s1 [file s1]

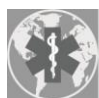

Supplementary Materials:

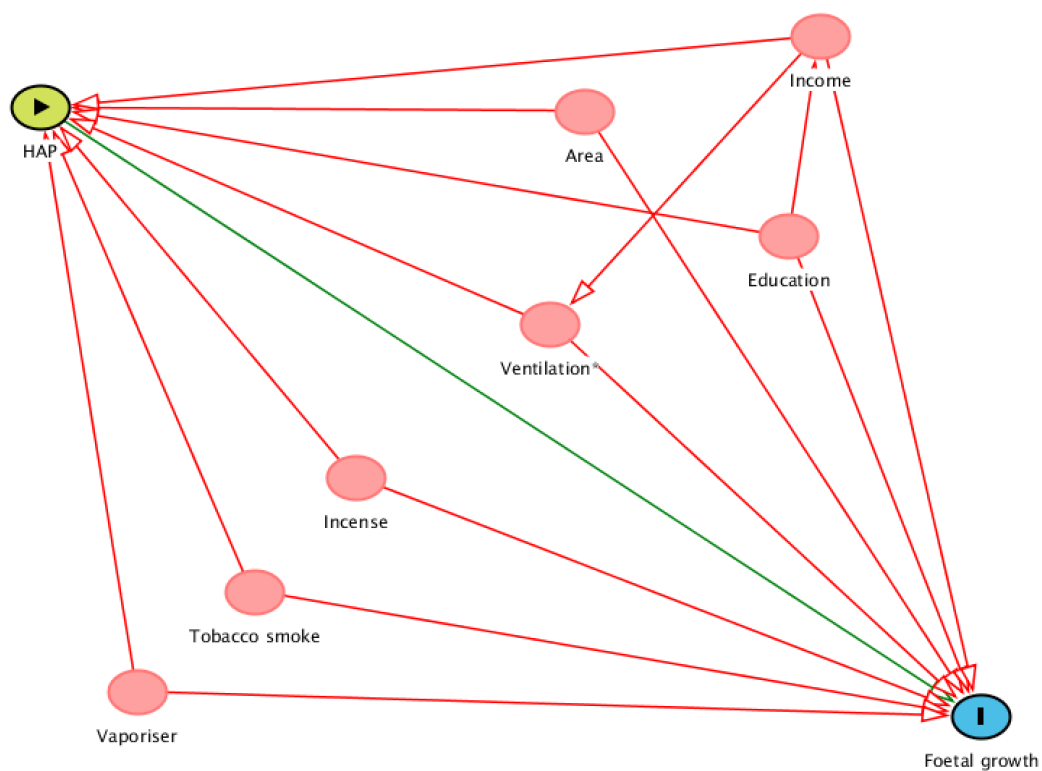

**Figure S1.** Directed Acyclic Graph of confounders for the relationship between Hap and impaired fetal growth.

**Table S1.** Household characteristics and maternal cooking habits during pregnancy for 445 live births in Central Sri Lanka in the past 6 years.

|                                                          | N   | %     |
|----------------------------------------------------------|-----|-------|
| <b>Hours devoted to cooking daily</b>                    |     |       |
| < 2 hours                                                | 46  | 10.34 |
| 2-3 hours                                                | 268 | 60.22 |
| >3 hours                                                 | 131 | 29.44 |
| <b>Trimesters during which mother engaged in cooking</b> |     |       |
| One trimester                                            | 22  | 5.95  |
| Two trimesters                                           | 57  | 15.41 |
| All                                                      | 291 | 78.65 |
| <b>Kitchen ventilation for biomass households</b>        |     |       |
| No chimney                                               | 64  | 30.05 |
| Chimney                                                  | 149 | 69.95 |
| No windows                                               | 49  | 22.90 |
| Windows                                                  | 165 | 77.10 |
| <b>Source of lighting</b>                                |     |       |
| Electricity                                              | 443 | 99.77 |
| Kerosene                                                 | 1   | 0.23  |
| <b>Other sources of household air pollution</b>          |     |       |
| Incense                                                  | 369 | 83.11 |
| Vaporizer                                                | 17  | 3.90  |
| First-hand tobacco smoke                                 | 0   | 0.00  |
| Second-hand tobacco smoke                                | 46  | 10.50 |

**Table S2.** Maternal and child health indices according to the primary fuel used during pregnancy for 445 live births in Central Sri Lanka in the past 6 years.

|                                                               | Clean energy<br>(Unexposed)<br>N = 230 (51.69%) | Biomass<br>(Exposed)<br>N = 215 (48.31%) | Total<br>N=445<br>n (%) |
|---------------------------------------------------------------|-------------------------------------------------|------------------------------------------|-------------------------|
| <b>Mother's age in years at time of childbirth, n (%)</b>     |                                                 |                                          |                         |
| ≤21                                                           | 16 (39.02)                                      | 25 (60.98)                               | 41 (9.21)               |
| 22-34                                                         | 179 (53.27)                                     | 157 (46.73)                              | 336 (75.51)             |
| ≥35                                                           | 35 (51.47)                                      | 33 (48.53)                               | 68 (15.28)              |
| <b>Mode of delivery, n (%)</b>                                |                                                 |                                          |                         |
| Normal                                                        | 115 (46.75)                                     | 131 (53.25)                              | 246 (55.28)             |
| Normal using forceps                                          | 5 (62.50)                                       | 3 (37.50)                                | 8 (1.80)                |
| Caesarean section                                             | 109 (57.37)                                     | 81 (42.63)                               | 190 (42.70)             |
| <b>Gravidity, n (%)</b>                                       |                                                 |                                          |                         |
| Primigravida                                                  | 65 (51.18)                                      | 62 (48.82)                               | 127 (28.54)             |
| Multigravida                                                  | 160 (52.12)                                     | 147 (47.88)                              | 307 (68.99)             |
| <b>Maternal health complications, n (%)</b>                   |                                                 |                                          |                         |
| Anemia                                                        | 22 (45.83)                                      | 26 (54.17)                               | 48 (10.79)              |
| Hypertension                                                  | 12 (50.00)                                      | 12 (50.00)                               | 24 (5.40)               |
| Diabetes                                                      | 18 (58.06)                                      | 13 (41.94)                               | 31 (6.97)               |
| <b>Maternal weight, n (%)</b>                                 |                                                 |                                          |                         |
| Underweight                                                   | 12 (40.00)                                      | 18 (60.00)                               | 30 (6.75)               |
| Normal weight                                                 | 201 (52.34)                                     | 183 (47.66)                              | 384 (69.66)             |
| Overweight                                                    | 17 (54.84)                                      | 14 (45.16)                               | 31 (6.97)               |
| <b>Gender of child, n (%)</b>                                 |                                                 |                                          |                         |
| Male                                                          | 133 (55.19)                                     | 108 (44.81)                              | 241 (54.26)             |
| Female                                                        | 97 (47.55)                                      | 107 (52.45)                              | 204 (45.84)             |
| <b>Birth outcomes</b>                                         |                                                 |                                          |                         |
| LBW                                                           | 24 (41.38)                                      | 34 (58.62)                               | 58 (13.03)              |
| SGA                                                           | 79 (44.13)                                      | 100 (55.87)                              | 179 (43.13)             |
| Pre-term birth                                                | 21 (63.64)                                      | 12 (36.36)                               | 33 (7.42)               |
| <b>Child measurements at birth, <math>\bar{x}</math> (SD)</b> |                                                 |                                          |                         |
| Birthweight (kg)                                              | 2.69 (0.47)                                     | 2.89 (0.42)                              | 2.92                    |
| Gestation period (weeks)                                      | 38.62 (2.32)                                    | 39.02 (1.82)                             | 38.81                   |

**Table S3.** Secondary fuels used based on primary fuel type.

| <i>Primary stove (N)</i> | <i>Secondary stove</i> |          |                     |                  |          |
|--------------------------|------------------------|----------|---------------------|------------------|----------|
|                          | Gas                    | Electric | Traditional Biomass | Improved Biomass | Kerosene |
| Gas (198)                | 0                      | 40       | 49                  | 85               | 0        |
| Electric (1)             | 0                      | 0        | 1                   | 0                | 0        |
| Traditional Biomass (83) | 57                     | 9        | 0                   | 0                | 0        |
| Improved Biomass (102)   | 65                     | 18       | 7                   | 0                | 1        |

## Annexure I

### The association between household air pollution on respiratory disease and pregnancy outcomes in Sri Lankan communities

Today's date: \_\_\_\_\_  
 Interviewer: \_\_\_\_\_  
 Survey ID: \_\_\_\_\_  
 Home address: \_\_\_\_\_  
 MoH and Village: \_\_\_\_\_  
 Contact number: \_\_\_\_\_  
 GPS location: \_\_\_\_\_

The purpose of this questionnaire is to investigate household fuel use for cooking and its health and environmental effects. It is for research purpose only. Please answer the questions to the best of your knowledge. Answers will be kept completely confidential and only be presented in summary formats.

Consented to the study? ☐ Yes ☐ No

#### SECTION A: Household Socio-Economic Characteristics

|                                                        |                  |
|--------------------------------------------------------|------------------|
| A1. How many people normally live in this home/ house? | _____            |
| A2. What is the monthly income of the family?          | _____ LKR/ month |

#### SECTION C: Stove Characteristics

|                                                                 |                                                                                                                                                                                                                                                                                                                                                                                                                                                                                                                                                                                                                                                                                                                                                                                                             |
|-----------------------------------------------------------------|-------------------------------------------------------------------------------------------------------------------------------------------------------------------------------------------------------------------------------------------------------------------------------------------------------------------------------------------------------------------------------------------------------------------------------------------------------------------------------------------------------------------------------------------------------------------------------------------------------------------------------------------------------------------------------------------------------------------------------------------------------------------------------------------------------------|
| C1. What is the primary stove type?                             | <input type="checkbox"/> Gas <span style="float: right;"><input type="checkbox"/> Electric</span><br><input type="checkbox"/> Kerosene<br><input type="checkbox"/> Mud Traditional <span style="float: right;"><input type="checkbox"/> Mud Improved</span><br><input type="checkbox"/> Other (specify) _____                                                                                                                                                                                                                                                                                                                                                                                                                                                                                               |
| C2. Which fuels are used?<br>Please tick all that apply         | <input type="checkbox"/> Firewood <span style="float: right;"><input type="checkbox"/> Sawdust <span style="float: right;"><input type="checkbox"/></span></span><br>Tree residue<br><input type="checkbox"/> Straw <span style="float: right;"><input type="checkbox"/> Rice husk <span style="float: right;"><input type="checkbox"/></span></span><br>Coconut husks/leaves<br><input type="checkbox"/> Animal residue <span style="float: right;"><input type="checkbox"/> Charcoal <span style="float: right;"><input type="checkbox"/> Kerosene</span></span><br><input type="checkbox"/> LPG <span style="float: right;"><input type="checkbox"/> Bio gas</span><br><input type="checkbox"/> Electricity<br><input type="checkbox"/> Coconut shells<br><input type="checkbox"/> Other (specify) _____ |
| C3. Does the stove have a chimney?                              | <input type="checkbox"/> Yes <span style="float: right;"><input type="checkbox"/> No</span>                                                                                                                                                                                                                                                                                                                                                                                                                                                                                                                                                                                                                                                                                                                 |
| C4. Do you have a secondary stove?<br>If no skip to question C8 | <input type="checkbox"/> Yes <span style="float: right;"><input type="checkbox"/> No</span>                                                                                                                                                                                                                                                                                                                                                                                                                                                                                                                                                                                                                                                                                                                 |
| C5. What type of stove is it?                                   | <input type="checkbox"/> Gas <span style="float: right;"><input type="checkbox"/> Electric</span><br><input type="checkbox"/> Kerosene<br><input type="checkbox"/> Mud Traditional <span style="float: right;"><input type="checkbox"/> Mud Improved</span><br><input type="checkbox"/> Other (specify) _____                                                                                                                                                                                                                                                                                                                                                                                                                                                                                               |
| C6. Which fuels are used?<br>Please tick all that apply         | <input type="checkbox"/> Firewood <span style="float: right;"><input type="checkbox"/> Sawdust <span style="float: right;"><input type="checkbox"/></span></span><br>Tree residue<br><input type="checkbox"/> Straw <span style="float: right;"><input type="checkbox"/> Rice husk <span style="float: right;"><input type="checkbox"/></span></span><br>Coconut husks/leaves<br><input type="checkbox"/> Animal residue <span style="float: right;"><input type="checkbox"/> Charcoal <span style="float: right;"><input type="checkbox"/> Kerosene</span></span><br><input type="checkbox"/> LPG <span style="float: right;"><input type="checkbox"/> Bio gas</span><br><input type="checkbox"/> Electricity<br><input type="checkbox"/> Coconut shell<br><input type="checkbox"/> Other (specify) _____  |

|                                                                 |                              |                             |
|-----------------------------------------------------------------|------------------------------|-----------------------------|
| C7. Does the stove have a chimney?                              | <input type="checkbox"/> Yes | <input type="checkbox"/> No |
| C8. Do you keep windows/doors of the kitchen open when cooking? | <input type="checkbox"/> Yes | <input type="checkbox"/> No |

#### SECTION D: Other Sources of Pollutants

|                                                                                          |                                                                                                                                                                |                             |
|------------------------------------------------------------------------------------------|----------------------------------------------------------------------------------------------------------------------------------------------------------------|-----------------------------|
| D1. Do you use mosquito coils inside the house?<br>If no skip to question D3             | <input type="checkbox"/> Yes                                                                                                                                   | <input type="checkbox"/> No |
| D2. How frequently do you use mosquito coils?                                            | <input type="checkbox"/> Daily<br><input type="checkbox"/> 1-2 times a week<br><input type="checkbox"/> 3 or more times a week <input type="checkbox"/> Rarely |                             |
| D3. Do you burn incense inside your house?<br>If no skip to question D5                  | <input type="checkbox"/> Yes                                                                                                                                   | <input type="checkbox"/> No |
| D4. How frequently do you burn incense inside your house?                                | <input type="checkbox"/> Daily<br><input type="checkbox"/> 1-2 times a week<br><input type="checkbox"/> 3 or more times a week <input type="checkbox"/> Rarely |                             |
| D5. Do you mosquito repellent vaporizers inside your house?<br>If no skip to question D7 | <input type="checkbox"/> Yes                                                                                                                                   | <input type="checkbox"/> No |
| D6. How frequently do you use vaporizers inside your house?                              | <input type="checkbox"/> Daily<br><input type="checkbox"/> 1-2 times a week<br><input type="checkbox"/> 3 or more times a week <input type="checkbox"/> Rarely |                             |
| D7. What is the main source of lighting used for your household?                         | <input type="checkbox"/> Electricity <input type="checkbox"/> Kerosene lamp<br><input type="checkbox"/> Other (specify) _____                                  |                             |

## SECTION E: Background Information

For all children  $\leq 5$  years and younger and adults  $\geq 18$  years living in the house

| Person ID                                              |                                                                                                                                                                                                                                                                                                                                                                               |                                                                                                                                                                                                                                                                                                                                                                               |                                                                                                                                                                                                                                                                                                                                                                               |                                                                                                                                                                                                                                                                                                                                                                               |
|--------------------------------------------------------|-------------------------------------------------------------------------------------------------------------------------------------------------------------------------------------------------------------------------------------------------------------------------------------------------------------------------------------------------------------------------------|-------------------------------------------------------------------------------------------------------------------------------------------------------------------------------------------------------------------------------------------------------------------------------------------------------------------------------------------------------------------------------|-------------------------------------------------------------------------------------------------------------------------------------------------------------------------------------------------------------------------------------------------------------------------------------------------------------------------------------------------------------------------------|-------------------------------------------------------------------------------------------------------------------------------------------------------------------------------------------------------------------------------------------------------------------------------------------------------------------------------------------------------------------------------|
| E1. What is your name?                                 | First:<br>Last:                                                                                                                                                                                                                                                                                                                                                               | First:<br>Last:                                                                                                                                                                                                                                                                                                                                                               | First:<br>Last:                                                                                                                                                                                                                                                                                                                                                               | First:<br>Last:                                                                                                                                                                                                                                                                                                                                                               |
| E2. What is your gender?                               | <input type="checkbox"/> Male<br><input type="checkbox"/> Female<br><input type="checkbox"/> Other/not specified                                                                                                                                                                                                                                                              | <input type="checkbox"/> Male<br><input type="checkbox"/> Female<br><input type="checkbox"/> Other/not specified                                                                                                                                                                                                                                                              | <input type="checkbox"/> Male<br><input type="checkbox"/> Female<br><input type="checkbox"/> Other/not specified                                                                                                                                                                                                                                                              | <input type="checkbox"/> Male<br><input type="checkbox"/> Female<br><input type="checkbox"/> Other/not specified                                                                                                                                                                                                                                                              |
| E3. What is your date of birth and age in years?       | DOB: dd/mm/yyyy<br>Age: _____ years                                                                                                                                                                                                                                                                                                                                           | DOB: dd/mm/yyyy<br>Age: _____ years                                                                                                                                                                                                                                                                                                                                           | DOB: dd/mm/yyyy<br>Age: _____ years                                                                                                                                                                                                                                                                                                                                           | DOB: dd/mm/yyyy<br>Age: _____ years                                                                                                                                                                                                                                                                                                                                           |
| E4. Adults: What is your highest education level?      | <input type="checkbox"/> No schooling<br><input type="checkbox"/> $\leq$ Grade 5 schooling<br><input type="checkbox"/> Grade 6-10 schooling<br><input type="checkbox"/> Grade 11-12 schooling<br><input type="checkbox"/> > Grade 12 schooling<br><input type="checkbox"/> Certificate/Diploma<br><input type="checkbox"/> Undergraduate<br><input type="checkbox"/> Graduate | <input type="checkbox"/> No schooling<br><input type="checkbox"/> $\leq$ Grade 5 schooling<br><input type="checkbox"/> Grade 6-10 schooling<br><input type="checkbox"/> Grade 11-12 schooling<br><input type="checkbox"/> > Grade 12 schooling<br><input type="checkbox"/> Certificate/Diploma<br><input type="checkbox"/> Undergraduate<br><input type="checkbox"/> Graduate | <input type="checkbox"/> No schooling<br><input type="checkbox"/> $\leq$ Grade 5 schooling<br><input type="checkbox"/> Grade 6-10 schooling<br><input type="checkbox"/> Grade 11-12 schooling<br><input type="checkbox"/> > Grade 12 schooling<br><input type="checkbox"/> Certificate/Diploma<br><input type="checkbox"/> Undergraduate<br><input type="checkbox"/> Graduate | <input type="checkbox"/> No schooling<br><input type="checkbox"/> $\leq$ Grade 5 schooling<br><input type="checkbox"/> Grade 6-10 schooling<br><input type="checkbox"/> Grade 11-12 schooling<br><input type="checkbox"/> > Grade 12 schooling<br><input type="checkbox"/> Certificate/Diploma<br><input type="checkbox"/> Undergraduate<br><input type="checkbox"/> Graduate |
| E5. How many years have you resided in the house?      | _____ years                                                                                                                                                                                                                                                                                                                                                                   | _____ years                                                                                                                                                                                                                                                                                                                                                                   | _____ years                                                                                                                                                                                                                                                                                                                                                                   | _____ years                                                                                                                                                                                                                                                                                                                                                                   |
| E6. Adults: What is your main occupation? Please tick. | <input type="checkbox"/> House wife<br><input type="checkbox"/> Unemployed<br><input type="checkbox"/> Farmer<br><input type="checkbox"/> Day labor                                                                                                                                                                                                                           | <input type="checkbox"/> House wife<br><input type="checkbox"/> Unemployed<br><input type="checkbox"/> Farmer<br><input type="checkbox"/> Day labor                                                                                                                                                                                                                           | <input type="checkbox"/> House wife<br><input type="checkbox"/> Unemployed<br><input type="checkbox"/> Farmer<br><input type="checkbox"/> Day labor                                                                                                                                                                                                                           | <input type="checkbox"/> House wife<br><input type="checkbox"/> Unemployed<br><input type="checkbox"/> Farmer<br><input type="checkbox"/> Day labor                                                                                                                                                                                                                           |

|                                                                                                  |                                                                                                                                                                                                                                                                                                                                     |                                                                                                                                                                                                                                                                                                                                     |                                                                                                                                                                                                                                                                                                                                     |                                                                                                                                                                                                                                                                                                                                     |
|--------------------------------------------------------------------------------------------------|-------------------------------------------------------------------------------------------------------------------------------------------------------------------------------------------------------------------------------------------------------------------------------------------------------------------------------------|-------------------------------------------------------------------------------------------------------------------------------------------------------------------------------------------------------------------------------------------------------------------------------------------------------------------------------------|-------------------------------------------------------------------------------------------------------------------------------------------------------------------------------------------------------------------------------------------------------------------------------------------------------------------------------------|-------------------------------------------------------------------------------------------------------------------------------------------------------------------------------------------------------------------------------------------------------------------------------------------------------------------------------------|
|                                                                                                  | <input type="checkbox"/> Self-employed<br><input type="checkbox"/> Student<br><input type="checkbox"/> Disabled<br><input type="checkbox"/> Others (please specify)<br>-----                                                                                                                                                        | <input type="checkbox"/> Self-employed<br><input type="checkbox"/> Student<br><input type="checkbox"/> Disabled<br><input type="checkbox"/> Others (please specify)<br>-----                                                                                                                                                        | <input type="checkbox"/> Self-employed<br><input type="checkbox"/> Student<br><input type="checkbox"/> Disabled<br><input type="checkbox"/> Others (please specify)<br>-----                                                                                                                                                        | <input type="checkbox"/> Self-employed<br><input type="checkbox"/> Student<br><input type="checkbox"/> Disabled<br><input type="checkbox"/> Others (please specify)<br>-----                                                                                                                                                        |
| E7. If applicable what is your secondary occupation? (use code mentioned for primary occupation) | <input type="checkbox"/> House wife<br><input type="checkbox"/> Unemployed<br><input type="checkbox"/> Farmer<br><input type="checkbox"/> Day labor<br><input type="checkbox"/> Self-employed<br><input type="checkbox"/> Student<br><input type="checkbox"/> Disabled<br><input type="checkbox"/> Others (please specify)<br>----- | <input type="checkbox"/> House wife<br><input type="checkbox"/> Unemployed<br><input type="checkbox"/> Farmer<br><input type="checkbox"/> Day labor<br><input type="checkbox"/> Self-employed<br><input type="checkbox"/> Student<br><input type="checkbox"/> Disabled<br><input type="checkbox"/> Others (please specify)<br>----- | <input type="checkbox"/> House wife<br><input type="checkbox"/> Unemployed<br><input type="checkbox"/> Farmer<br><input type="checkbox"/> Day labor<br><input type="checkbox"/> Self-employed<br><input type="checkbox"/> Student<br><input type="checkbox"/> Disabled<br><input type="checkbox"/> Others (please specify)<br>----- | <input type="checkbox"/> House wife<br><input type="checkbox"/> Unemployed<br><input type="checkbox"/> Farmer<br><input type="checkbox"/> Day labor<br><input type="checkbox"/> Self-employed<br><input type="checkbox"/> Student<br><input type="checkbox"/> Disabled<br><input type="checkbox"/> Others (please specify)<br>----- |
| E8. Each day how many hours on average do you spend in kitchen while food is being cooked?       | ----- hours                                                                                                                                                                                                                                                                                                                         | ----- hours                                                                                                                                                                                                                                                                                                                         | ----- hours                                                                                                                                                                                                                                                                                                                         | ----- hours                                                                                                                                                                                                                                                                                                                         |
| E9. Are you a smoker?                                                                            | <input type="checkbox"/> Yes<br><input type="checkbox"/> No<br><input type="checkbox"/> Ex-smoker                                                                                                                                                                                                                                   | <input type="checkbox"/> Yes<br><input type="checkbox"/> No<br><input type="checkbox"/> Ex-smoker                                                                                                                                                                                                                                   | <input type="checkbox"/> Yes<br><input type="checkbox"/> No<br><input type="checkbox"/> Ex-smoker                                                                                                                                                                                                                                   | <input type="checkbox"/> Yes<br><input type="checkbox"/> No<br><input type="checkbox"/> Ex-smoker                                                                                                                                                                                                                                   |
| E10. If yes, or ex-smoker how do/did you smoke?                                                  | <input type="checkbox"/> Loose tobacco<br><input type="checkbox"/> Cigarette without filter<br><input type="checkbox"/> Cigarette with filter                                                                                                                                                                                       | <input type="checkbox"/> Loose tobacco<br><input type="checkbox"/> Cigarette without filter<br><input type="checkbox"/> Cigarette with filter                                                                                                                                                                                       | <input type="checkbox"/> Loose tobacco<br><input type="checkbox"/> Cigarette without filter<br><input type="checkbox"/> Cigarette with filter                                                                                                                                                                                       | <input type="checkbox"/> Loose tobacco<br><input type="checkbox"/> Cigarette without filter<br><input type="checkbox"/> Cigarette with filter                                                                                                                                                                                       |
| E11. How many cigarettes per day do you/ did you smoke on average?                               |                                                                                                                                                                                                                                                                                                                                     |                                                                                                                                                                                                                                                                                                                                     |                                                                                                                                                                                                                                                                                                                                     |                                                                                                                                                                                                                                                                                                                                     |

|  |                 |                 |                 |                 |
|--|-----------------|-----------------|-----------------|-----------------|
|  | _____cigarettes | _____cigarettes | _____cigarettes | _____cigarettes |
|--|-----------------|-----------------|-----------------|-----------------|

Continue...For all children  $\leq 5$  years and younger and adults  $\geq 18$  years living in the house

|                                                   |                                                                                                                                                                                                                                                                                                                                                                               |                                                                                                                                                                                                                                                                                                                                                                               |                                                                                                                                                                                                                                                                                                                                                                               |                                                                                                                                                                                                                                                                                                                                                                               |
|---------------------------------------------------|-------------------------------------------------------------------------------------------------------------------------------------------------------------------------------------------------------------------------------------------------------------------------------------------------------------------------------------------------------------------------------|-------------------------------------------------------------------------------------------------------------------------------------------------------------------------------------------------------------------------------------------------------------------------------------------------------------------------------------------------------------------------------|-------------------------------------------------------------------------------------------------------------------------------------------------------------------------------------------------------------------------------------------------------------------------------------------------------------------------------------------------------------------------------|-------------------------------------------------------------------------------------------------------------------------------------------------------------------------------------------------------------------------------------------------------------------------------------------------------------------------------------------------------------------------------|
| Person ID                                         |                                                                                                                                                                                                                                                                                                                                                                               |                                                                                                                                                                                                                                                                                                                                                                               |                                                                                                                                                                                                                                                                                                                                                                               |                                                                                                                                                                                                                                                                                                                                                                               |
| E1. What is your name?                            | First:<br>Last:                                                                                                                                                                                                                                                                                                                                                               | First:<br>Last:                                                                                                                                                                                                                                                                                                                                                               | First:<br>Last:                                                                                                                                                                                                                                                                                                                                                               | First:<br>Last:                                                                                                                                                                                                                                                                                                                                                               |
| E2. What is your gender?                          | <input type="checkbox"/> Male<br><input type="checkbox"/> Female<br><input type="checkbox"/> Other/not specified                                                                                                                                                                                                                                                              | <input type="checkbox"/> Male<br><input type="checkbox"/> Female<br><input type="checkbox"/> Other/not specified                                                                                                                                                                                                                                                              | <input type="checkbox"/> Male<br><input type="checkbox"/> Female<br><input type="checkbox"/> Other/not specified                                                                                                                                                                                                                                                              | <input type="checkbox"/> Male<br><input type="checkbox"/> Female<br><input type="checkbox"/> Other/not specified                                                                                                                                                                                                                                                              |
| E3. What is your date of birth and age in years?  | DOB: dd/mm/yyyy<br>Age: _____ years                                                                                                                                                                                                                                                                                                                                           | DOB: dd/mm/yyyy<br>Age: _____ years                                                                                                                                                                                                                                                                                                                                           | DOB: dd/mm/yyyy<br>Age: _____ years                                                                                                                                                                                                                                                                                                                                           | DOB: dd/mm/yyyy<br>Age: _____ years                                                                                                                                                                                                                                                                                                                                           |
| E4. Adults: What is your highest education level? | <input type="checkbox"/> No schooling<br><input type="checkbox"/> $\leq$ Grade 5 schooling<br><input type="checkbox"/> Grade 6-10 schooling<br><input type="checkbox"/> Grade 11-12 schooling<br><input type="checkbox"/> > Grade 12 schooling<br><input type="checkbox"/> Certificate/Diploma<br><input type="checkbox"/> Undergraduate<br><input type="checkbox"/> Graduate | <input type="checkbox"/> No schooling<br><input type="checkbox"/> $\leq$ Grade 5 schooling<br><input type="checkbox"/> Grade 6-10 schooling<br><input type="checkbox"/> Grade 11-12 schooling<br><input type="checkbox"/> > Grade 12 schooling<br><input type="checkbox"/> Certificate/Diploma<br><input type="checkbox"/> Undergraduate<br><input type="checkbox"/> Graduate | <input type="checkbox"/> No schooling<br><input type="checkbox"/> $\leq$ Grade 5 schooling<br><input type="checkbox"/> Grade 6-10 schooling<br><input type="checkbox"/> Grade 11-12 schooling<br><input type="checkbox"/> > Grade 12 schooling<br><input type="checkbox"/> Certificate/Diploma<br><input type="checkbox"/> Undergraduate<br><input type="checkbox"/> Graduate | <input type="checkbox"/> No schooling<br><input type="checkbox"/> $\leq$ Grade 5 schooling<br><input type="checkbox"/> Grade 6-10 schooling<br><input type="checkbox"/> Grade 11-12 schooling<br><input type="checkbox"/> > Grade 12 schooling<br><input type="checkbox"/> Certificate/Diploma<br><input type="checkbox"/> Undergraduate<br><input type="checkbox"/> Graduate |
| E5. How many years have you resided in the house? | _____ years                                                                                                                                                                                                                                                                                                                                                                   | _____ years                                                                                                                                                                                                                                                                                                                                                                   | _____ years                                                                                                                                                                                                                                                                                                                                                                   | _____ years                                                                                                                                                                                                                                                                                                                                                                   |

|                                                                                                  |                                                                                                                                                                                                                                                                                                                                     |                                                                                                                                                                                                                                                                                                                                     |                                                                                                                                                                                                                                                                                                                                     |                                                                                                                                                                                                                                                                                                                                     |
|--------------------------------------------------------------------------------------------------|-------------------------------------------------------------------------------------------------------------------------------------------------------------------------------------------------------------------------------------------------------------------------------------------------------------------------------------|-------------------------------------------------------------------------------------------------------------------------------------------------------------------------------------------------------------------------------------------------------------------------------------------------------------------------------------|-------------------------------------------------------------------------------------------------------------------------------------------------------------------------------------------------------------------------------------------------------------------------------------------------------------------------------------|-------------------------------------------------------------------------------------------------------------------------------------------------------------------------------------------------------------------------------------------------------------------------------------------------------------------------------------|
| E6. Adults: What is your main occupation? Please tick.                                           | <input type="checkbox"/> House wife<br><input type="checkbox"/> Unemployed<br><input type="checkbox"/> Farmer<br><input type="checkbox"/> Day labor<br><input type="checkbox"/> Self-employed<br><input type="checkbox"/> Student<br><input type="checkbox"/> Disabled<br><input type="checkbox"/> Others (please specify)<br>----- | <input type="checkbox"/> House wife<br><input type="checkbox"/> Unemployed<br><input type="checkbox"/> Farmer<br><input type="checkbox"/> Day labor<br><input type="checkbox"/> Self-employed<br><input type="checkbox"/> Student<br><input type="checkbox"/> Disabled<br><input type="checkbox"/> Others (please specify)<br>----- | <input type="checkbox"/> House wife<br><input type="checkbox"/> Unemployed<br><input type="checkbox"/> Farmer<br><input type="checkbox"/> Day labor<br><input type="checkbox"/> Self-employed<br><input type="checkbox"/> Student<br><input type="checkbox"/> Disabled<br><input type="checkbox"/> Others (please specify)<br>----- | <input type="checkbox"/> House wife<br><input type="checkbox"/> Unemployed<br><input type="checkbox"/> Farmer<br><input type="checkbox"/> Day labor<br><input type="checkbox"/> Self-employed<br><input type="checkbox"/> Student<br><input type="checkbox"/> Disabled<br><input type="checkbox"/> Others (please specify)<br>----- |
| E7. If applicable what is your secondary occupation? (use code mentioned for primary occupation) | <input type="checkbox"/> House wife<br><input type="checkbox"/> Unemployed<br><input type="checkbox"/> Farmer<br><input type="checkbox"/> Day labor<br><input type="checkbox"/> Self-employed<br><input type="checkbox"/> Student<br><input type="checkbox"/> Disabled<br><input type="checkbox"/> Others (please specify)<br>----- | <input type="checkbox"/> House wife<br><input type="checkbox"/> Unemployed<br><input type="checkbox"/> Farmer<br><input type="checkbox"/> Day labor<br><input type="checkbox"/> Self-employed<br><input type="checkbox"/> Student<br><input type="checkbox"/> Disabled<br><input type="checkbox"/> Others (please specify)<br>----- | <input type="checkbox"/> House wife<br><input type="checkbox"/> Unemployed<br><input type="checkbox"/> Farmer<br><input type="checkbox"/> Day labor<br><input type="checkbox"/> Self-employed<br><input type="checkbox"/> Student<br><input type="checkbox"/> Disabled<br><input type="checkbox"/> Others (please specify)<br>----- | <input type="checkbox"/> House wife<br><input type="checkbox"/> Unemployed<br><input type="checkbox"/> Farmer<br><input type="checkbox"/> Day labor<br><input type="checkbox"/> Self-employed<br><input type="checkbox"/> Student<br><input type="checkbox"/> Disabled<br><input type="checkbox"/> Others (please specify)<br>----- |
| E8. Each day how many hours on average do you spend in kitchen while food is being cooked?       | ----- hours                                                                                                                                                                                                                                                                                                                         | ----- hours                                                                                                                                                                                                                                                                                                                         | ----- hours                                                                                                                                                                                                                                                                                                                         | ----- hours                                                                                                                                                                                                                                                                                                                         |
| E9. Are you a smoker?                                                                            | <input type="checkbox"/> Yes<br><input type="checkbox"/> No<br><input type="checkbox"/> Ex-smoker                                                                                                                                                                                                                                   | <input type="checkbox"/> Yes<br><input type="checkbox"/> No<br><input type="checkbox"/> Ex-smoker                                                                                                                                                                                                                                   | <input type="checkbox"/> Yes<br><input type="checkbox"/> No<br><input type="checkbox"/> Ex-smoker                                                                                                                                                                                                                                   | <input type="checkbox"/> Yes<br><input type="checkbox"/> No<br><input type="checkbox"/> Ex-smoker                                                                                                                                                                                                                                   |
| E10. If yes, or ex-smoker how do/did                                                             | <input type="checkbox"/> Loose tobacco                                                                                                                                                                                                                                                                                              | <input type="checkbox"/> Loose tobacco                                                                                                                                                                                                                                                                                              | <input type="checkbox"/> Loose tobacco                                                                                                                                                                                                                                                                                              | <input type="checkbox"/> Loose tobacco                                                                                                                                                                                                                                                                                              |

|                                                                    |                                                                                                     |                                                                                                     |                                                                                                     |                                                                                                     |
|--------------------------------------------------------------------|-----------------------------------------------------------------------------------------------------|-----------------------------------------------------------------------------------------------------|-----------------------------------------------------------------------------------------------------|-----------------------------------------------------------------------------------------------------|
| you smoke?                                                         | <input type="checkbox"/> Cigarette without filter<br><input type="checkbox"/> Cigarette with filter | <input type="checkbox"/> Cigarette without filter<br><input type="checkbox"/> Cigarette with filter | <input type="checkbox"/> Cigarette without filter<br><input type="checkbox"/> Cigarette with filter | <input type="checkbox"/> Cigarette without filter<br><input type="checkbox"/> Cigarette with filter |
| E11. How many cigarettes per day do you/ did you smoke on average? | _____ cigarettes                                                                                    | _____ cigarettes                                                                                    | _____ cigarettes                                                                                    | _____ cigarettes                                                                                    |

### SECTION F: Characteristics of Primary Cook

Please provide information for each person who cooks in the household. By cooking we mean cooking while the stove is in use.

| ID of cook                                                 |                                                             |                                                             |                                                             |                                                             |
|------------------------------------------------------------|-------------------------------------------------------------|-------------------------------------------------------------|-------------------------------------------------------------|-------------------------------------------------------------|
| F1. At which age did you start to cook?                    | _____ years                                                 | _____ years                                                 | _____ years                                                 | _____ years                                                 |
| F2. How many days do you cook in a week?                   | _____ days                                                  | _____ days                                                  | _____ days                                                  | _____ days                                                  |
| F3. On a typical day, how many hours do you spend cooking? | _____ hours                                                 | _____ hours                                                 | _____ hours                                                 | _____ hours                                                 |
| F4. Do you still engage in cooking?                        | <input type="checkbox"/> Yes<br><input type="checkbox"/> No | <input type="checkbox"/> Yes<br><input type="checkbox"/> No | <input type="checkbox"/> Yes<br><input type="checkbox"/> No | <input type="checkbox"/> Yes<br><input type="checkbox"/> No |

## SECTION G: Pregnancy Outcomes

(Questions from this section are specific to the mother)

I1. How many children have you had?

\_\_\_\_\_ children

I2. Have you ever had a stillbirth (infant died in womb after 28 weeks of gestation)?

☐ Yes ☐ No

I3. Have you ever had an abortion (miscarriage before 3 months)?

☐ Yes ☐ No

I4. Have you ever lost a child within one week of their birth (perinatal mortality)?

☐ Yes ☐ No

(The following questions are to be answered by the mother relevant to each child under the age of 5 years)

| Child ID                                                                                  |                                                                                                                                                                                   |                                                                                                                                                                                   |                                                                                                                                                                                   |                                                                                                                                                                                   |
|-------------------------------------------------------------------------------------------|-----------------------------------------------------------------------------------------------------------------------------------------------------------------------------------|-----------------------------------------------------------------------------------------------------------------------------------------------------------------------------------|-----------------------------------------------------------------------------------------------------------------------------------------------------------------------------------|-----------------------------------------------------------------------------------------------------------------------------------------------------------------------------------|
| I5. When you were pregnant, were you involved in cooking? If no skip to I8                | <input type="checkbox"/> Yes<br><input type="checkbox"/> No                                                                                                                       | <input type="checkbox"/> Yes<br><input type="checkbox"/> No                                                                                                                       | <input type="checkbox"/> Yes<br><input type="checkbox"/> No                                                                                                                       | <input type="checkbox"/> Yes<br><input type="checkbox"/> No                                                                                                                       |
| I6. If yes, please state during which trimesters.                                         | <input type="checkbox"/> Trimester 1<br><input type="checkbox"/> Trimester 2<br><input type="checkbox"/> Trimester 3<br><input type="checkbox"/> ALL                              | <input type="checkbox"/> Trimester 1<br><input type="checkbox"/> Trimester 2<br><input type="checkbox"/> Trimester 3<br><input type="checkbox"/> ALL                              | <input type="checkbox"/> Trimester 1<br><input type="checkbox"/> Trimester 2<br><input type="checkbox"/> Trimester 3<br><input type="checkbox"/> ALL                              | <input type="checkbox"/> Trimester 1<br><input type="checkbox"/> Trimester 2<br><input type="checkbox"/> Trimester 3<br><input type="checkbox"/> ALL                              |
| I7. If yes how many hours did you spending cooking on average each day?                   | <input type="checkbox"/> <1 hour per day<br><input type="checkbox"/> 1-2 hours per day<br><input type="checkbox"/> 2-5 hours per day<br><input type="checkbox"/> >5 hours per day | <input type="checkbox"/> <1 hour per day<br><input type="checkbox"/> 1-2 hours per day<br><input type="checkbox"/> 2-5 hours per day<br><input type="checkbox"/> >5 hours per day | <input type="checkbox"/> <1 hour per day<br><input type="checkbox"/> 1-2 hours per day<br><input type="checkbox"/> 2-5 hours per day<br><input type="checkbox"/> >5 hours per day | <input type="checkbox"/> <1 hour per day<br><input type="checkbox"/> 1-2 hours per day<br><input type="checkbox"/> 2-5 hours per day<br><input type="checkbox"/> >5 hours per day |
| I8. When you were pregnant did you use mosquito coils inside the house? If no skip to I10 | <input type="checkbox"/> Yes<br><input type="checkbox"/> No                                                                                                                       | <input type="checkbox"/> Yes<br><input type="checkbox"/> No                                                                                                                       | <input type="checkbox"/> Yes<br><input type="checkbox"/> No                                                                                                                       | <input type="checkbox"/> Yes<br><input type="checkbox"/> No                                                                                                                       |

|                                                                                        |                                                                                                                                                                   |                                                                                                                                                                   |                                                                                                                                                                   |                                                                                                                                                                   |
|----------------------------------------------------------------------------------------|-------------------------------------------------------------------------------------------------------------------------------------------------------------------|-------------------------------------------------------------------------------------------------------------------------------------------------------------------|-------------------------------------------------------------------------------------------------------------------------------------------------------------------|-------------------------------------------------------------------------------------------------------------------------------------------------------------------|
| I9. If yes how often did you use mosquito coils?                                       | <input type="checkbox"/> Daily<br><input type="checkbox"/> 1-2 times a week<br><input type="checkbox"/> 3 or more times a week<br><input type="checkbox"/> Rarely | <input type="checkbox"/> Daily<br><input type="checkbox"/> 1-2 times a week<br><input type="checkbox"/> 3 or more times a week<br><input type="checkbox"/> Rarely | <input type="checkbox"/> Daily<br><input type="checkbox"/> 1-2 times a week<br><input type="checkbox"/> 3 or more times a week<br><input type="checkbox"/> Rarely | <input type="checkbox"/> Daily<br><input type="checkbox"/> 1-2 times a week<br><input type="checkbox"/> 3 or more times a week<br><input type="checkbox"/> Rarely |
| I10. When you were pregnant did you use incense inside the house? If no skip to I12    | <input type="checkbox"/> Yes<br><input type="checkbox"/> No                                                                                                       | <input type="checkbox"/> Yes<br><input type="checkbox"/> No                                                                                                       | <input type="checkbox"/> Yes<br><input type="checkbox"/> No                                                                                                       | <input type="checkbox"/> Yes<br><input type="checkbox"/> No                                                                                                       |
| I11. If yes how often did you use incense?                                             | <input type="checkbox"/> Daily<br><input type="checkbox"/> 1-2 times a week<br><input type="checkbox"/> 3 or more times a week<br><input type="checkbox"/> Rarely | <input type="checkbox"/> Daily<br><input type="checkbox"/> 1-2 times a week<br><input type="checkbox"/> 3 or more times a week<br><input type="checkbox"/> Rarely | <input type="checkbox"/> Daily<br><input type="checkbox"/> 1-2 times a week<br><input type="checkbox"/> 3 or more times a week<br><input type="checkbox"/> Rarely | <input type="checkbox"/> Daily<br><input type="checkbox"/> 1-2 times a week<br><input type="checkbox"/> 3 or more times a week<br><input type="checkbox"/> Rarely |
| I12. When you were pregnant did you use vaporizers inside the house? If no skip to I14 | <input type="checkbox"/> Yes<br><input type="checkbox"/> No                                                                                                       | <input type="checkbox"/> Yes<br><input type="checkbox"/> No                                                                                                       | <input type="checkbox"/> Yes<br><input type="checkbox"/> No                                                                                                       | <input type="checkbox"/> Yes<br><input type="checkbox"/> No                                                                                                       |
| I13. If yes how often did you use vaporizers?                                          | <input type="checkbox"/> Daily<br><input type="checkbox"/> 1-2 times a week<br><input type="checkbox"/> 3 or more times a week<br><input type="checkbox"/> Rarely | <input type="checkbox"/> Daily<br><input type="checkbox"/> 1-2 times a week<br><input type="checkbox"/> 3 or more times a week<br><input type="checkbox"/> Rarely | <input type="checkbox"/> Daily<br><input type="checkbox"/> 1-2 times a week<br><input type="checkbox"/> 3 or more times a week<br><input type="checkbox"/> Rarely | <input type="checkbox"/> Daily<br><input type="checkbox"/> 1-2 times a week<br><input type="checkbox"/> 3 or more times a week<br><input type="checkbox"/> Rarely |
| I14. Did you drink alcohol during pregnancy? If no skip to I16                         | <input type="checkbox"/> Yes<br><input type="checkbox"/> No                                                                                                       | <input type="checkbox"/> Yes<br><input type="checkbox"/> No                                                                                                       | <input type="checkbox"/> Yes<br><input type="checkbox"/> No                                                                                                       | <input type="checkbox"/> Yes<br><input type="checkbox"/> No                                                                                                       |

|                                                                                                  |                                                                                                                                                                   |                                                                                                                                                                   |                                                                                                                                                                   |                                                                                                                                                                   |
|--------------------------------------------------------------------------------------------------|-------------------------------------------------------------------------------------------------------------------------------------------------------------------|-------------------------------------------------------------------------------------------------------------------------------------------------------------------|-------------------------------------------------------------------------------------------------------------------------------------------------------------------|-------------------------------------------------------------------------------------------------------------------------------------------------------------------|
| I15. If yes how many times did you drink on an average week?                                     | <input type="checkbox"/> Daily<br><input type="checkbox"/> 1-2 times a week<br><input type="checkbox"/> 3 or more times a week<br><input type="checkbox"/> Rarely | <input type="checkbox"/> Daily<br><input type="checkbox"/> 1-2 times a week<br><input type="checkbox"/> 3 or more times a week<br><input type="checkbox"/> Rarely | <input type="checkbox"/> Daily<br><input type="checkbox"/> 1-2 times a week<br><input type="checkbox"/> 3 or more times a week<br><input type="checkbox"/> Rarely | <input type="checkbox"/> Daily<br><input type="checkbox"/> 1-2 times a week<br><input type="checkbox"/> 3 or more times a week<br><input type="checkbox"/> Rarely |
| I16. Did you smoke tobacco during pregnancy? If no skip to I18                                   | <input type="checkbox"/> Yes<br><input type="checkbox"/> No                                                                                                       | <input type="checkbox"/> Yes<br><input type="checkbox"/> No                                                                                                       | <input type="checkbox"/> Yes<br><input type="checkbox"/> No                                                                                                       | <input type="checkbox"/> Yes<br><input type="checkbox"/> No                                                                                                       |
| I17. If yes how many times did you smoke on average each day?                                    | <input type="checkbox"/> Daily<br><input type="checkbox"/> 1-2 times a week<br><input type="checkbox"/> 3 or more times a week<br><input type="checkbox"/> Rarely | <input type="checkbox"/> Daily<br><input type="checkbox"/> 1-2 times a week<br><input type="checkbox"/> 3 or more times a week<br><input type="checkbox"/> Rarely | <input type="checkbox"/> Daily<br><input type="checkbox"/> 1-2 times a week<br><input type="checkbox"/> 3 or more times a week<br><input type="checkbox"/> Rarely | <input type="checkbox"/> Daily<br><input type="checkbox"/> 1-2 times a week<br><input type="checkbox"/> 3 or more times a week<br><input type="checkbox"/> Rarely |
| I18. Did anyone else in your household smoke tobacco whilst you were pregnant? If no skip to I20 | <input type="checkbox"/> Yes<br><input type="checkbox"/> No                                                                                                       | <input type="checkbox"/> Yes<br><input type="checkbox"/> No                                                                                                       | <input type="checkbox"/> Yes<br><input type="checkbox"/> No                                                                                                       | <input type="checkbox"/> Yes<br><input type="checkbox"/> No                                                                                                       |
| I19. If yes how many times were you exposed to the smoke on average each week?                   | <input type="checkbox"/> Daily<br><input type="checkbox"/> 1-2 times a week<br><input type="checkbox"/> 3 or more times a week<br><input type="checkbox"/> Rarely | <input type="checkbox"/> Daily<br><input type="checkbox"/> 1-2 times a week<br><input type="checkbox"/> 3 or more times a week<br><input type="checkbox"/> Rarely | <input type="checkbox"/> Daily<br><input type="checkbox"/> 1-2 times a week<br><input type="checkbox"/> 3 or more times a week<br><input type="checkbox"/> Rarely | <input type="checkbox"/> Daily<br><input type="checkbox"/> 1-2 times a week<br><input type="checkbox"/> 3 or more times a week<br><input type="checkbox"/> Rarely |

|                                                                                                                                     |                                          |                                          |                                          |                                          |
|-------------------------------------------------------------------------------------------------------------------------------------|------------------------------------------|------------------------------------------|------------------------------------------|------------------------------------------|
| I20. Did you have any of the following health complications during pregnancy? Please tick all that apply, and state any not listed. | <input type="checkbox"/> Anemia          | <input type="checkbox"/> Anemia          | <input type="checkbox"/> Anemia          | <input type="checkbox"/> Anemia          |
|                                                                                                                                     | <input type="checkbox"/> Malnutrition    | <input type="checkbox"/> Malnutrition    | <input type="checkbox"/> Malnutrition    | <input type="checkbox"/> Malnutrition    |
|                                                                                                                                     | <input type="checkbox"/> Obesity         | <input type="checkbox"/> Obesity         | <input type="checkbox"/> Obesity         | <input type="checkbox"/> Obesity         |
|                                                                                                                                     | <input type="checkbox"/> Diabetes        | <input type="checkbox"/> Diabetes        | <input type="checkbox"/> Diabetes        | <input type="checkbox"/> Diabetes        |
|                                                                                                                                     | <input type="checkbox"/> Hypertension    | <input type="checkbox"/> Hypertension    | <input type="checkbox"/> Hypertension    | <input type="checkbox"/> Hypertension    |
|                                                                                                                                     | <input type="checkbox"/> Dengue fever    | <input type="checkbox"/> Dengue fever    | <input type="checkbox"/> Dengue fever    | <input type="checkbox"/> Dengue fever    |
|                                                                                                                                     | <input type="checkbox"/> HIV/AIDs        | <input type="checkbox"/> HIV/AIDs        | <input type="checkbox"/> HIV/AIDs        | <input type="checkbox"/> HIV/AIDs        |
|                                                                                                                                     | <input type="checkbox"/> Kidney disease  | <input type="checkbox"/> Kidney disease  | <input type="checkbox"/> Kidney disease  | <input type="checkbox"/> Kidney disease  |
|                                                                                                                                     | <input type="checkbox"/> Thyroid disease | <input type="checkbox"/> Thyroid disease | <input type="checkbox"/> Thyroid disease | <input type="checkbox"/> Thyroid disease |
|                                                                                                                                     | <input type="checkbox"/> Other (specify) | <input type="checkbox"/> Other (specify) | <input type="checkbox"/> Other (specify) | <input type="checkbox"/> Other (specify) |
|                                                                                                                                     | _____                                    | _____                                    | _____                                    | _____                                    |
|                                                                                                                                     | _____                                    | _____                                    | _____                                    | _____                                    |

(The following questions are to be answered using birth cards for each child under the age of 5 years)

| Child ID                                                 |                                                                                                                                                                         |                                                                                                                                                                         |                                                                                                                                                                         |                                                                                                                                                                         |
|----------------------------------------------------------|-------------------------------------------------------------------------------------------------------------------------------------------------------------------------|-------------------------------------------------------------------------------------------------------------------------------------------------------------------------|-------------------------------------------------------------------------------------------------------------------------------------------------------------------------|-------------------------------------------------------------------------------------------------------------------------------------------------------------------------|
| I21. Was child part of a multiple pregnancy i.e. a twin? | <input type="checkbox"/> Yes<br><input type="checkbox"/> No                                                                                                             | <input type="checkbox"/> Yes<br><input type="checkbox"/> No                                                                                                             | <input type="checkbox"/> Yes<br><input type="checkbox"/> No                                                                                                             | <input type="checkbox"/> Yes<br><input type="checkbox"/> No                                                                                                             |
| I22. What is the gender of the child?                    | <input type="checkbox"/> Male<br><input type="checkbox"/> Female                                                                                                        | <input type="checkbox"/> Male<br><input type="checkbox"/> Female                                                                                                        | <input type="checkbox"/> Male<br><input type="checkbox"/> Female                                                                                                        | <input type="checkbox"/> Male<br><input type="checkbox"/> Female                                                                                                        |
| I23. What was the mother's age at time of child birth?   | _____ years                                                                                                                                                             | _____ years                                                                                                                                                             | _____ years                                                                                                                                                             | _____ years                                                                                                                                                             |
| I24. What was the mode of child delivery?                | <input type="checkbox"/> Normal<br><input type="checkbox"/> Normal using forceps<br><input type="checkbox"/> Using vacuum<br><input type="checkbox"/> Caesarean section | <input type="checkbox"/> Normal<br><input type="checkbox"/> Normal using forceps<br><input type="checkbox"/> Using vacuum<br><input type="checkbox"/> Caesarean section | <input type="checkbox"/> Normal<br><input type="checkbox"/> Normal using forceps<br><input type="checkbox"/> Using vacuum<br><input type="checkbox"/> Caesarean section | <input type="checkbox"/> Normal<br><input type="checkbox"/> Normal using forceps<br><input type="checkbox"/> Using vacuum<br><input type="checkbox"/> Caesarean section |
| I25. What was the birth weight of the child in kg?       | _____ kg                                                                                                                                                                | _____ kg                                                                                                                                                                | _____ kg                                                                                                                                                                | _____ kg                                                                                                                                                                |
| I26. What was the child's height at the                  |                                                                                                                                                                         |                                                                                                                                                                         |                                                                                                                                                                         |                                                                                                                                                                         |

|                                                                                                        |                                                                   |                                                                   |                                                                   |                                                                   |
|--------------------------------------------------------------------------------------------------------|-------------------------------------------------------------------|-------------------------------------------------------------------|-------------------------------------------------------------------|-------------------------------------------------------------------|
| time of birth in cm?                                                                                   | _____ cm                                                          | _____ cm                                                          | _____ cm                                                          | _____ cm                                                          |
| I27. What was the head-circumference of the child at the time of birth in cm?                          | _____ cm                                                          | _____ cm                                                          | _____ cm                                                          | _____ cm                                                          |
| I28. Was the child born preterm?                                                                       | <input type="checkbox"/> Yes<br><input type="checkbox"/> No       | <input type="checkbox"/> Yes<br><input type="checkbox"/> No       | <input type="checkbox"/> Yes<br><input type="checkbox"/> No       | <input type="checkbox"/> Yes<br><input type="checkbox"/> No       |
| I29. What was the gestation period in weeks? (interviewee to ask mother as not on birth card)          | _____ weeks                                                       | _____ weeks                                                       | _____ weeks                                                       | _____ weeks                                                       |
| I30. Did the child have neonatal complications?                                                        | <input type="checkbox"/> Yes<br><input type="checkbox"/> No       | <input type="checkbox"/> Yes<br><input type="checkbox"/> No       | <input type="checkbox"/> Yes<br><input type="checkbox"/> No       | <input type="checkbox"/> Yes<br><input type="checkbox"/> No       |
| I31. Did the child have congenital abnormalities?                                                      | <input type="checkbox"/> Yes<br><input type="checkbox"/> No       | <input type="checkbox"/> Yes<br><input type="checkbox"/> No       | <input type="checkbox"/> Yes<br><input type="checkbox"/> No       | <input type="checkbox"/> Yes<br><input type="checkbox"/> No       |
| I32. Did the child have congenital hypothyroidism?                                                     | <input type="checkbox"/> Yes<br><input type="checkbox"/> No       | <input type="checkbox"/> Yes<br><input type="checkbox"/> No       | <input type="checkbox"/> Yes<br><input type="checkbox"/> No       | <input type="checkbox"/> Yes<br><input type="checkbox"/> No       |
| I33. Did neonatal examination indicate any abnormalities? (If “yes” please state as on the birth card) | <input type="checkbox"/> Yes _____<br><input type="checkbox"/> No | <input type="checkbox"/> Yes _____<br><input type="checkbox"/> No | <input type="checkbox"/> Yes _____<br><input type="checkbox"/> No | <input type="checkbox"/> Yes _____<br><input type="checkbox"/> No |
